# Supplementary material for: AMPK activation, eEF2 inactivation, and reduced protein synthesis in the cerebral cortex of hibernating chipmunks
Source: PubMed Central journal article supplement (PMC6695389; doi:10.1038/s41598-019-48172-7), 2019-08-15
Supplement: 41598_2019_48172_MOESM1_ESM.pdf [file 41598_2019_48172_MOESM1_ESM.pdf]

## **Supplemental Figures**

***AMPK activation, eEF2 inactivation, and reduced protein synthesis in the cerebral cortex of hibernating chipmunks***

Shintaro Yamada, Taito Kamata, Hiroyuki Nawa, Tsuneo Sekijima  
and Nobuyuki Takei

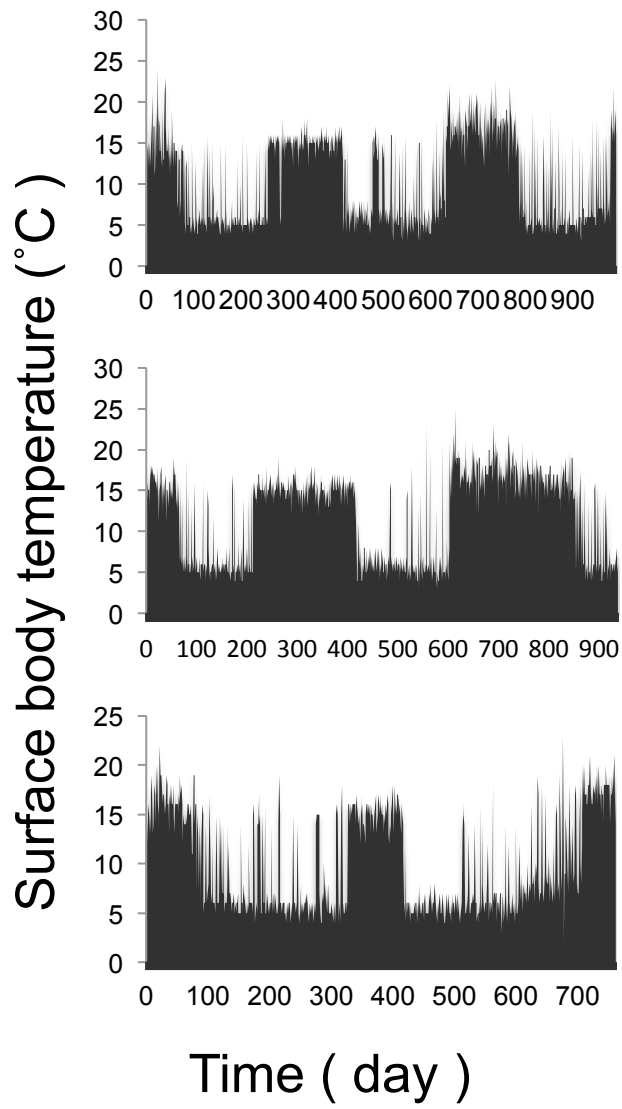

Supplemental Figure 1

(a)

(b)

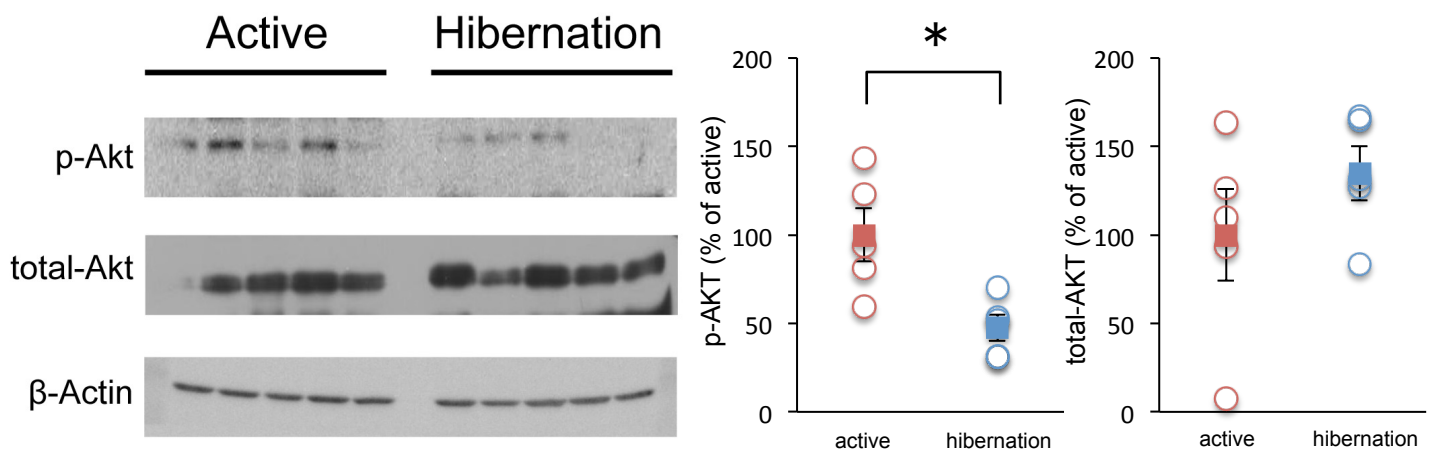

Supplemental Figure. 2

|        | ..... ..... | ..... ..... | ..... ..... | ..... ..... | ..... ..... | ..... ..... |
|--------|-------------|-------------|-------------|-------------|-------------|-------------|
|        | 5           | 15          | 25          | 35          | 45          | 55          |
| M.musc | IGHYILGDTL  | GVGTFGKVKV  | GKHELTGHKV  | AVKILNRQKI  | RSLDVVGKIR  | REIQNLKLF   |
| R.norv | IGHYILGDTL  | GVGTFGKVKV  | GKHELTGHKV  | AVKILNRQKI  | RSLDVVGKIR  | REIQNLKLF   |
| O.cuni | IGHYILGDTL  | GVGTFGKVKV  | GKHELTGHKV  | AVKILNRQKI  | RSLDVVGKIR  | REIQNLKLF   |
| H.sapi | IGHYILGDTL  | GVGTFGKVKV  | GKHELTGHKV  | AVKILNRQKI  | RSLDVVGKIR  | REIQNLKLF   |
| U.parr | IGHYILGDTL  | GVGTFGKVKV  | GKHELTGHKV  | AVKILNRQKI  | RSLDVVGKIR  | REIQNLKLF   |
| I.trid | -----       | -----       | -----       | -----       | -----       | -----       |
|        | ..... ..... | ..... ..... | ..... ..... | ..... ..... | ..... ..... | ..... ..... |
|        | 65          | 75          | 85          | 95          | 105         | 115         |
| M.musc | HPHIKLYQV   | ISTPSDIFMV  | MEYVSGGELF  | DYICKNGR--  | -----       | ---LDEKESR  |
| R.norv | HPHIKLYQV   | ISTPSDIFMV  | MEYVSGGELF  | DYICKNGR--  | -----       | ---LDEKESR  |
| O.cuni | HPHIKLYQV   | ISTPSDIFMV  | MEYVSGGELF  | DYICKNGR--  | -----       | ---LDEKESR  |
| H.sapi | HPHIKLYQV   | ISTPSDIFMV  | MEYVSGGELF  | DYICKNGR--  | -----       | ---LDEKESR  |
| U.parr | HPHIKLYQV   | ISTPSDIFMV  | MEYVSGGELF  | DYICKNGR--  | -----       | ---LDEKESR  |
| I.trid | -----       | -----MV     | MEYVSGGELF  | DYICKNGR--  | -----       | ---LDEKESR  |
|        | ..... ..... | ..... ..... | ..... ..... | ..... ..... | ..... ..... | ..... ..... |
|        | 125         | 135         | 145         | 155         | 165         | 175         |
| M.musc | RLFQQILSGV  | DYCHRHMVVH  | RDLKPENVLL  | DAHMNAKIAD  | FGLSNMMSDG  | EFLRTSCGSP  |
| R.norv | RLFQQILSGV  | DYCHRHMVVH  | RDLKPENVLL  | DAHMNAKIAD  | FGLSNMMSDG  | EFLRTSCGSP  |
| O.cuni | RLFQQILSGV  | DYCHRHMVVH  | RDLKPENVLL  | DAHMNAKIAD  | FGLSNMMSDG  | EFLRTSCGSP  |
| H.sapi | RLFQQILSGV  | DYCHRHMVVH  | RDLKPENVLL  | DAHMNAKIAD  | FGLSNMMSDG  | EFLRTSCGSP  |
| U.parr | RLFQQILSGV  | DYCHRHMVVH  | RDLKPENVLL  | DAHMNAKIAD  | FGLSNMMSDG  | EFLRTSCGSP  |
| I.trid | RLFQQILSGV  | DYCHRHMVVH  | RDLKPENVLL  | DAHMNAKIAD  | FGLSNMMSDG  | EFLRTSCGSP  |
|        | ..... ..... | ..... ..... | ..... ..... | ..... ..... | ..... ..... | ..... ..... |
|        | 185         | 195         | 205         | 215         | 225         | 235         |
| M.musc | NYAAPEVISG  | RLYAGPEVDI  | WSSGVILYAL  | LCGTLPFDDD  | HVPTLFKKIC  | DGIFYTPQYL  |
| R.norv | NYAAPEVISG  | RLYAGPEVDI  | WSSGVILYAL  | LCGTLPFDDD  | HVPTLFKKIC  | DGIFYTPQYL  |
| O.cuni | NYAAPEVISG  | RLYAGPEVDI  | WSSGVILYAL  | LCGTLPFDDD  | HVPTLFKKIC  | DGIFYTPQYL  |
| H.sapi | NYAAPEVISG  | RLYAGPEVDI  | WSSGVILYAL  | LCGTLPFDDD  | HVPTLFKKIC  | DGIFYTPQYL  |
| U.parr | NYAAPEVISG  | RLYAGPEVDI  | WSSGVILYAL  | LCGTLPFDDD  | HVPTLFKKIC  | DGIFYTPQYL  |
| I.trid | NYAAPEVISG  | RLYAGPEVDI  | WSSGVILYAL  | LCGTLPFDDD  | HVPTLFKKIC  | DGIFYTPQYL  |
|        | ..... ..... | ..... ..... | ..... ..... | ..... ..... | ..... ..... | ..... ..... |
|        | 245         | 255         | 265         | .           |             |             |
| M.musc | NPSVISLLKH  | MLQVDPMKRA  | AIKDIREHEW  | F           |             |             |
| R.norv | NPSVISLLKH  | MLQVDPMKRA  | TIKDIREHEW  | F           |             |             |
| O.cuni | NSSVISLLKH  | MLQVDPMKRA  | TIKDIREHEW  | F           |             |             |
| H.sapi | NPSVISLLKH  | MLQVDPMKRA  | TIKDIREHEW  | F           |             |             |

## Supplemental Figure 3

## Legends to Supplemental Figures

**Supplemental Figure 1.** Examples of active-hibernation rhythms of surface body temperature of chipmunks. Note some of the individuals looks free-running of rhythm over a year.

**Supplemental Figure 2.** Phosphorylation of Akt in cerebral cortex of chipmunks during active and hibernation periods. Panel b shows quantitation of the blots by Image J. Each circle represents the each band. Squares represent mean $\pm$ SE (n=5). \* $p$ <0.05 (Student  $t$ -test)

**Supplemental Figure 3.** Comparison of amino acid sequences of different species. M. musc: mouse, R. norv: rat, O. cuni: rabbit, H. sapi: human, U. parr: arctic ground squirrel, I. trid: thirteen-lined ground squirrel. Red "T" indicates phosphorylation amino acid residue.

**Supplemental Figure 4.** Recombinant antigens were prepared as described in materials& methods. Rat recombinant GST-AMPK $\alpha$  (a, b) and Flag-eEF2 (c, d) were applied to SDS-PAGE and transferred to the PVDF membrane. Western blotting was performed using anti-total AMPK $\alpha$  (a), anti-P-AMPK $\alpha$  (b), anti-total eEF2 (c) and anti-P-eEF2 (d). Purified antigens were used for absorption of each antibody. Antibody specificity was checked as follows. Same amount (40  $\mu$ g) of the lysates of newly sacrificed chipmunk brain were applied to Western blotting using anti-AMPK $\alpha$  (e, f), anti-P-AMPK $\alpha$  (g, h) , anti-total eEF2 (i, j) and anti-P-eEF2 (k,l) antibodies. f, h, j, l were blotted with antigen-absorbed antibodies and images were obtained in longer exposure time.

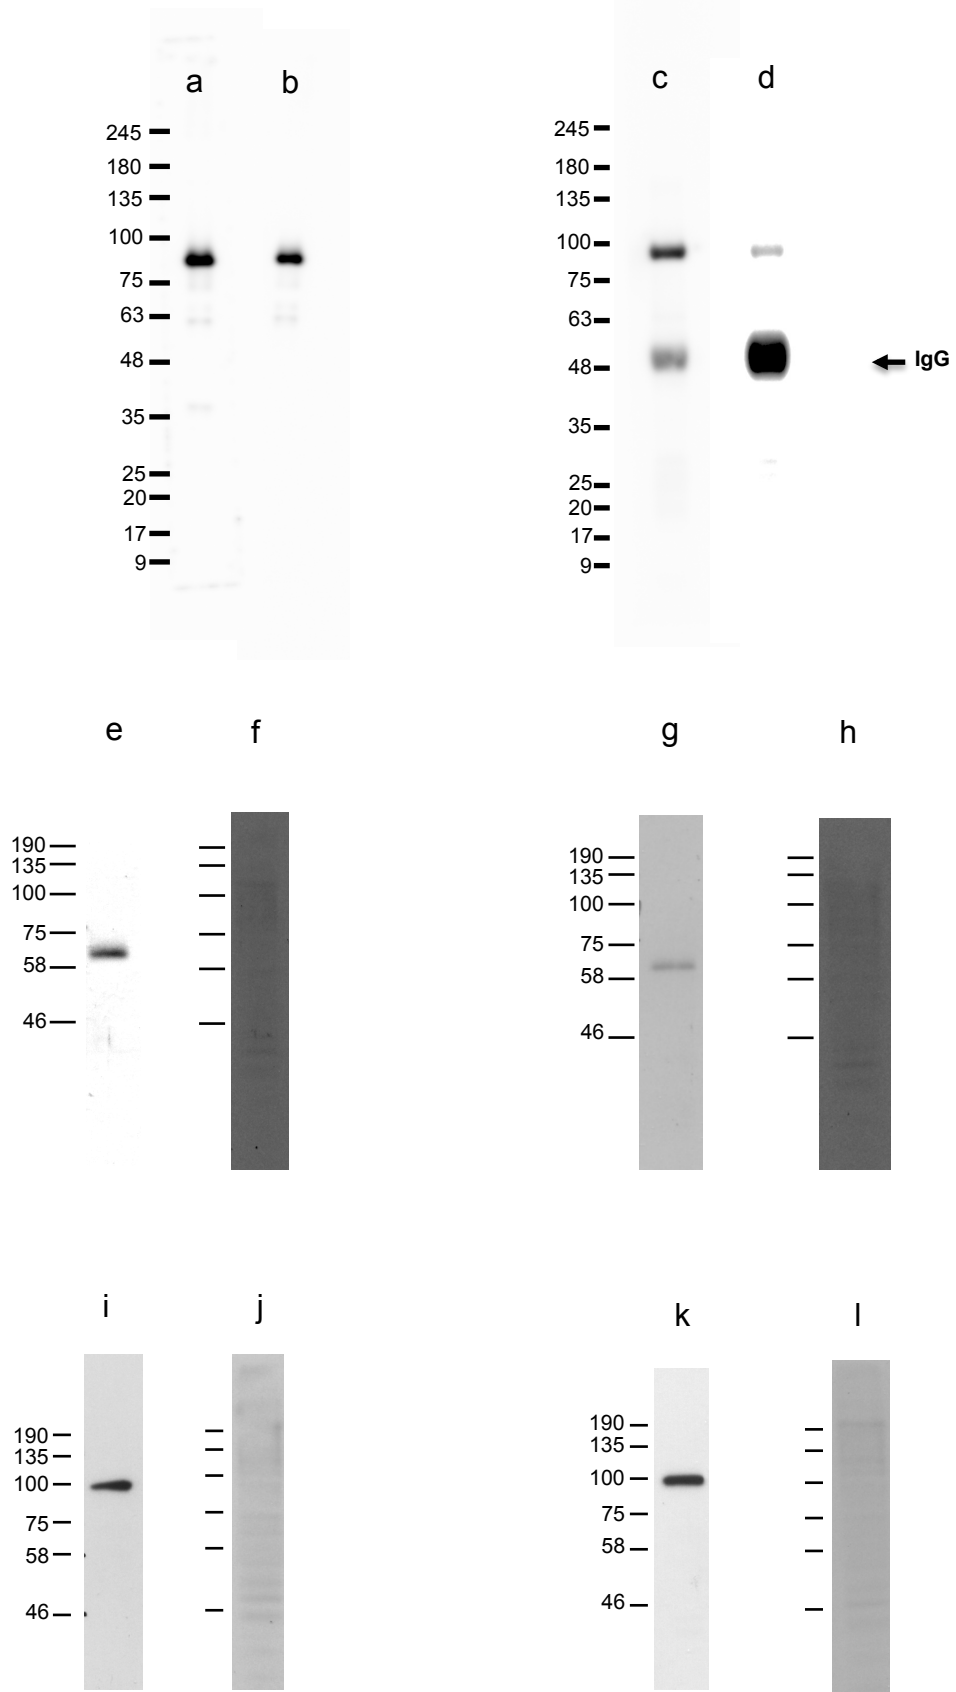

Supplemental Figure 4
